# Supplementary material for: Application of machine learning for predicting G9a inhibitors
Source: Royal Society of Chemistry journal article supplement (doi:10.1039/d4dd00101j), 2024-01-01
Supplement: d4dd00101j1.pdf [file d4dd00101j1.pdf]

## Supplementary Materials

### Application of Machine Learning for Predicting G9a Inhibitors

Mariya L. Ivanova , Nicola Russo, Nadia Djaid and Konstantin Nikolic

School of Computing and Engineering, University of West London, London W5 5RF, UK

#### Contents

|                                                                                                                                                       |    |
|-------------------------------------------------------------------------------------------------------------------------------------------------------|----|
| Figures .....                                                                                                                                         | 2  |
| Figure 1. Visualisation of the AID 504332 PubChem BioAssay, .....                                                                                     | 2  |
| Figure 2. Visualisation of the AID 1996 PubChem BioAssay, .....                                                                                       | 2  |
| Figure 3. Mechanism of data partitioning for ML.....                                                                                                  | 3  |
| Figure 4. Comparison of the training and testing performance of the model that performed best in cross-validation, for each of the four datasets..... | 3  |
| Tables.....                                                                                                                                           | 5  |
| Table 1. Cross-validation (CV) scores for Accuracy, for four datasets and five classifiers. ....                                                      | 5  |
| Table 2: Parameters used for Hyperparameter tuning of the RFC with Dataset 4 with five features. ....                                                 | 6  |
| Table 3. Classification report of Random Forest Classifier with the five feature Dataset 4. ....                                                      | 6  |
| Table 4. Six architectures of ANN tuned by Optuna .....                                                                                               | 6  |
| Table 5. Accuracy results from six runs of RFC and ANN.....                                                                                           | 7  |
| Table 6 Area under the curve results from six runs of sklearn RFC with dataset 4 and PySpark RFC with dataset 5 .....                                 | 7  |
| Feature Description.....                                                                                                                              | 8  |
| A list with the features used for the final datasets (on GitHub) .....                                                                                | 8  |
| <b>Features imported from the PubChem database.</b> ....                                                                                              | 8  |
| <b>Features derived by additional calculations.</b> .....                                                                                             | 9  |
| Packages.....                                                                                                                                         | 10 |

## Figures

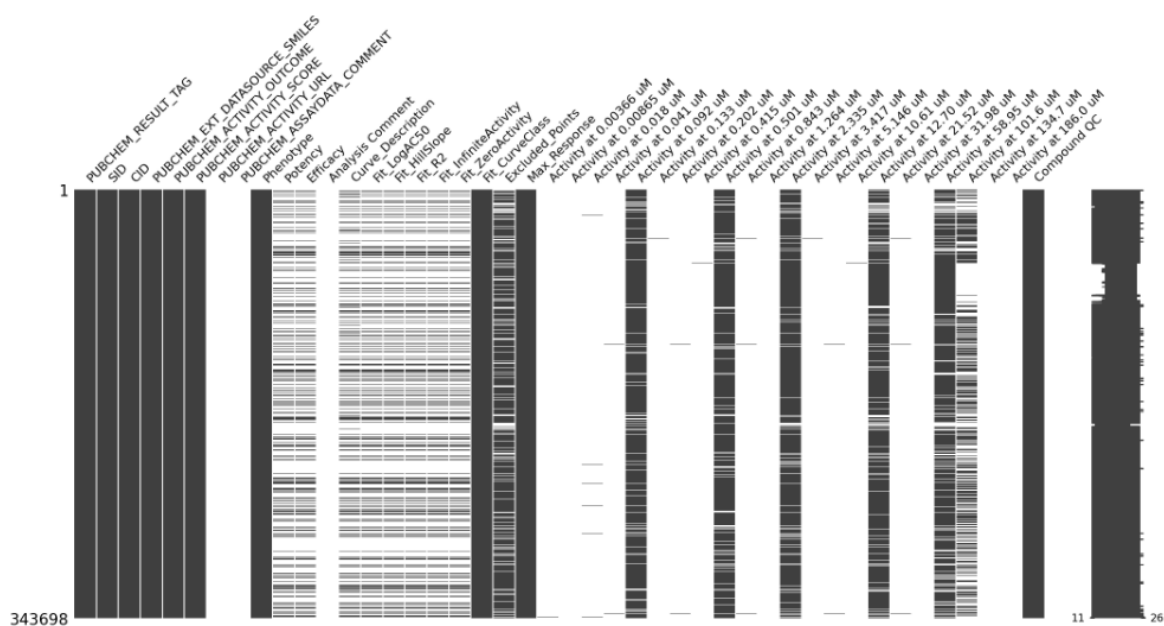

Figure 1. Visualisation of the AID 504332 PubChem BioAssay, which describes activity of G9a enzyme in the presence of various compounds and substances. The assay results are represented as a matrix with 343,698 rows (where each row represents one compound or substance), and 56 columns (where each column represents a relevant attribute for each compound). Only compounds and substances IDs and the activity label are taken from this table. The IDs were then used for collecting information about the compounds from PubChem.

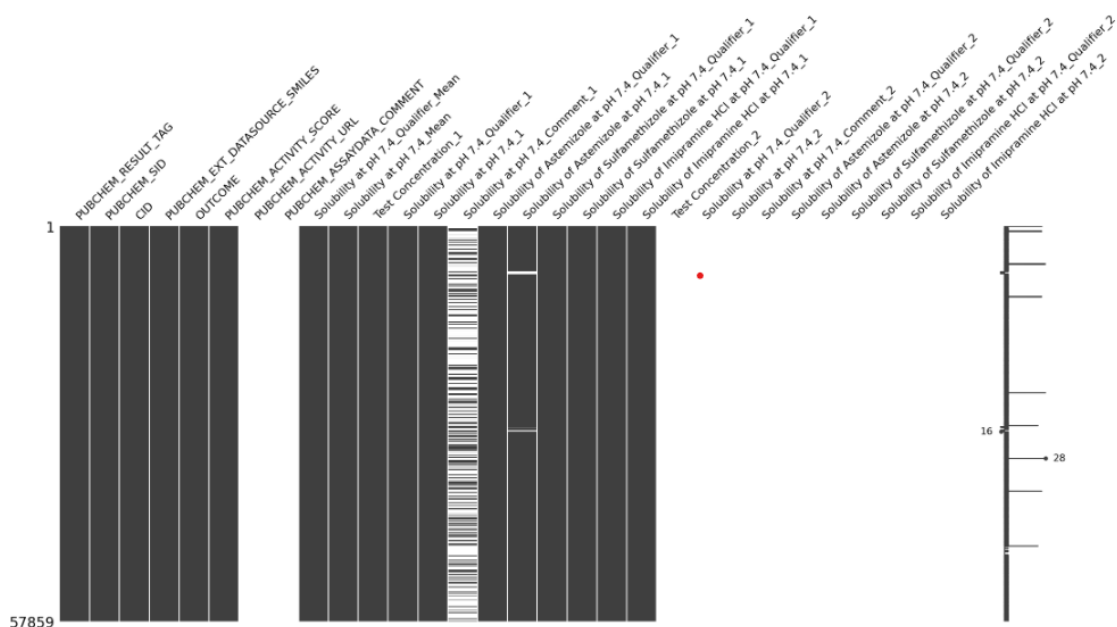

Figure 2. Visualisation of the AID 1996 PubChem BioAssay, which describes solubility of different compounds. The matrix consists of 57,859 rows and 30 columns. Only compounds and substances IDs and Solubility (in water) at 7.4pH Mean are taken from this table.

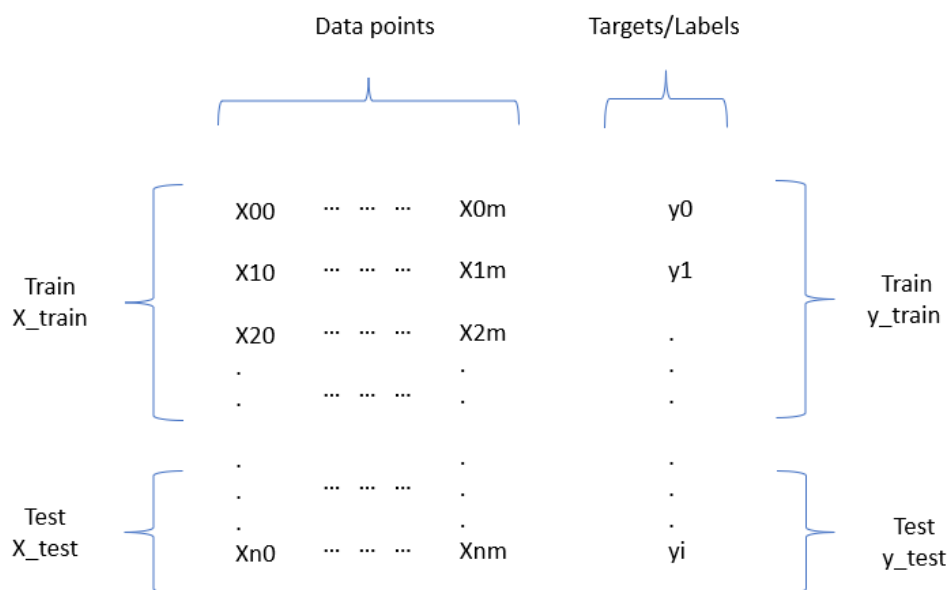

Figure 3. Mechanism of data partitioning for ML

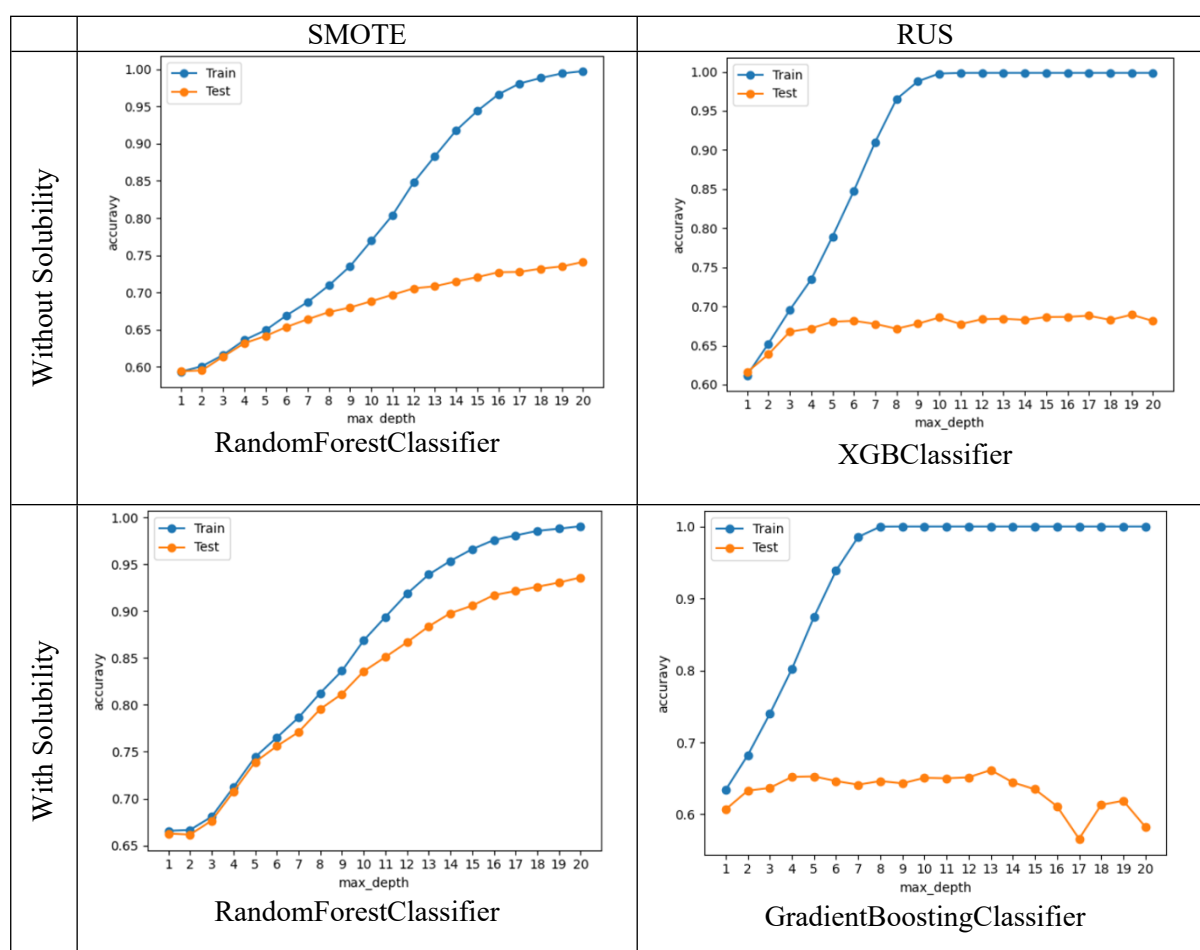

Figure 4. Comparison of the training and testing performance of the model that performed best in cross-validation, for each of the four datasets.

This analysis indicates when the overfitting starts, which is typically at the point just before the divergence between the two curves exceeds 5%.

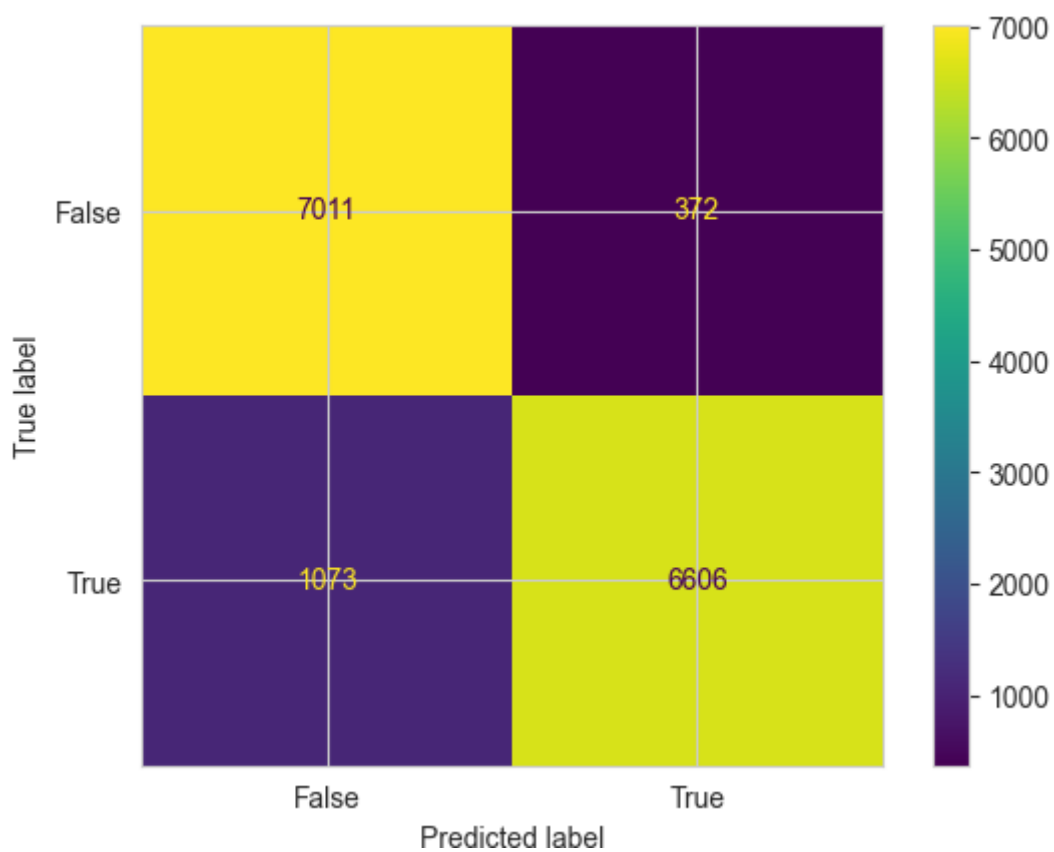

Figure 5. Confusion matrix of the five-feature ML with Random Forest Classifier

## Tables

Table 1. Cross-validation (CV) scores for Accuracy, for four datasets and five classifiers.

|                      |               | Cross-validation results |                 |                      |                                                 |
|----------------------|---------------|--------------------------|-----------------|----------------------|-------------------------------------------------|
|                      |               | 1.Algorithm              | 2.Mean CV Score | 3.Standard Deviation | 4.List of CV Scores                             |
|                      |               | Without Solubility data  | RUS             | 4                    | XGBoost                                         |
| 2                    | RandomForest  |                          |                 | 0.6757               | 0.0031 [0.6778, 0.6738, 0.6802, 0.6755, 0.6714] |
| 3                    | GradientBoost |                          |                 | 0.6494               | 0.0068 [0.6515, 0.6471, 0.6616, 0.6422, 0.6445] |
| 1                    | Decision      |                          |                 | 0.5844               | 0.0059 [0.588, 0.5748, 0.5924, 0.5819, 0.5847]  |
| 0                    | SVM           |                          |                 | 0.5756               | 0.0029 [0.5738, 0.5747, 0.5766, 0.5807, 0.5723] |
| SMOTE                | 2             |                          | RandomForest    | 0.7456               | 0.0016 [0.7469, 0.7449, 0.7469, 0.7465, 0.7428] |
|                      | 4             |                          | XGBoost         | 0.7406               | 0.0031 [0.7418, 0.7368, 0.7459, 0.7399, 0.7389] |
|                      | 3             |                          | GradientBoost   | 0.6862               | 0.0032 [0.6881, 0.6836, 0.6892, 0.689, 0.6812]  |
|                      | 1             |                          | Decision        | 0.6360               | 0.0032 [0.6386, 0.6333, 0.6393, 0.6377, 0.6312] |
|                      | 0             |                          | SVM             | 0.5782               | 0.0030 [0.5841, 0.577, 0.577, 0.5771, 0.5758]   |
| With Solubility data | RUS           | 3                        | GradientBoost   | 0.6475               | 0.0096 [0.6565, 0.6329, 0.6582, 0.6403, 0.6499] |
|                      |               | 4                        | XGBoost         | 0.6445               | 0.0043 [0.6444, 0.6456, 0.639, 0.6518, 0.6416]  |
|                      |               | 2                        | RandomForest    | 0.6426               | 0.0109 [0.6418, 0.6444, 0.6518, 0.6524, 0.6224] |
|                      |               | 1                        | Decision        | 0.5618               | 0.0060 [0.5551, 0.5602, 0.5644, 0.5574, 0.5721] |
|                      |               | 0                        | SVM             | 0.5437               | 0.0065 [0.5341, 0.5398, 0.5536, 0.5446, 0.5466] |
|                      | SMOTE         | 2                        | RandomForest    | 0.9516               | 0.0024 [0.9507, 0.9487, 0.9545, 0.9499, 0.9543] |
|                      |               | 4                        | XGBoost         | 0.9458               | 0.0007 [0.9468, 0.9462, 0.9458, 0.9445, 0.946]  |
|                      |               | 1                        | Decision        | 0.8712               | 0.0065 [0.8703, 0.8648, 0.8683, 0.8689, 0.8836] |
|                      |               | 3                        | GradientBoost   | 0.8680               | 0.0031 [0.8685, 0.8693, 0.8632, 0.8665, 0.8727] |
|                      |               | 0                        | SVM             | 0.6071               | 0.0046 [0.6064, 0.6071, 0.6107, 0.5989, 0.6122] |

Table 2: Parameters used for Hyperparameter tuning of the RFC with Dataset 4 with five features.

| Hyperparameters     | Values                        | Default |
|---------------------|-------------------------------|---------|
| 'n_estimators'      | 50, 100, 200                  | 100     |
| critierion          | 'gini', 'entropy', 'log_loss' | 'gini'  |
| 'max_depth'         | None, 2, 5, 10, 20            | None    |
| 'min_samples_split' | 2, 10, 20, 50                 | 2       |
| 'min_samples_leaf'  | 1, 2, 10, 20, 50              | 1       |
| 'oob_score'         | False, True                   |         |

Table 3. Classification report of Random Forest Classifier with the five feature Dataset 4.

|                     | precision | recall | f1-score | support |
|---------------------|-----------|--------|----------|---------|
| Active (target 1)   | 0.87      | 0.95   | 0.91     | 7383    |
| Inactive (target 0) | 0.94      | 0.86   | 0.90     | 7679    |
| accuracy            |           |        | 0.90     | 15062   |
| macro avg           | 0.91      | 0.90   | 0.90     | 15062   |
| weighted avg        | 0.91      | 0.90   | 0.90     | 15062   |

Table 4. Six architectures of ANN tuned by Optuna

| ANN hyperparameters tuned by Optuna |          |         |          |           |             |
|-------------------------------------|----------|---------|----------|-----------|-------------|
| run                                 | n_layers | neurons | drop_out | optimiser | learn. rate |
| 1                                   | 2        | 67      | 0.499    | SGD       | 0.0009      |
|                                     |          | 17      | 0.296    |           |             |
| 2                                   | 2        | 23      | 0.305    | Adam      | 0.00003     |
|                                     |          | 27      | 0.296    |           |             |
| 3                                   | 3        | 28      | 0.294    | SGD       | 0.00004     |
|                                     |          | 74      | 0.489    |           |             |
|                                     |          | 80      | 0.251    |           |             |
| 4                                   | 3        | 74      | 0.353    | SGD       | 0.0001      |
|                                     |          | 34      | 0.33     |           |             |
|                                     |          | 45      | 0.232    |           |             |
| 5                                   | 3        | 122     | 0.318    | Adam      | 0.00005     |
|                                     |          | 49      | 0.467    |           |             |
|                                     |          | 50      | 0.329    |           |             |
| 6                                   | 2        | 114     | 0.371    | Adam      | 0.0005      |
|                                     |          | 67      | 0.227    |           |             |

Table 5. Accuracy results from six runs of RFC and ANN

| <b>Accuracy</b> |             |            |
|-----------------|-------------|------------|
|                 | <b>RFC</b>  | <b>ANN</b> |
|                 | 0.9         | 0.66       |
|                 | 0.902       | 0.6        |
|                 | 0.9         | 0.62       |
|                 | 0.9         | 0.68       |
|                 | 0.898       | 0.64       |
|                 | 0.9         | 0.7        |
|                 | sklearn RFC | ANN        |
| mean            | 0.900       | 0.650      |
| stand dev       | 0.001       | 0.037      |

Table 6 Area under the curve results from six runs of sklearn RFC with dataset 4 and PySpark RFC with dataset 5

| <b>Area Under the Curve (AUC)</b> |                    |                    |
|-----------------------------------|--------------------|--------------------|
|                                   | <b>sklearn RFC</b> | <b>PySpark RFC</b> |
|                                   | 0.892              | 0.654              |
|                                   | 0.903              | 0.657              |
|                                   | 0.9                | 0.657              |
|                                   | 0.901              | 0.653              |
|                                   | 0.9                | 0.67               |
|                                   | 0.901              | 0.677              |
|                                   | sklearn RFC        | PySpark RFC        |
| mean                              | 0.900              | 0.661              |
| stand dev                         | 0.004              | 0.010              |

## Feature Description

A list with the features used for the final datasets (on GitHub)

| #  | Column               |    |                    |
|----|----------------------|----|--------------------|
| 0  | Solubility_at_pH_7_4 | 31 | Volume_1_3D        |
| 1  | MW                   | 32 | XY_3D_volume       |
| 2  | TPSA                 | 33 | XZ_3D_volume       |
| 3  | XL                   | 34 | YZ_3D_volume       |
| 4  | HAC                  | 35 | C_relative         |
| 5  | HBDC                 | 36 | H_relative         |
| 6  | HBAC                 | 37 | O_relative         |
| 7  | RBC                  | 38 | S_relative         |
| 8  | CBUC                 | 39 | N_relative         |
| 9  | MMX6                 | 40 | Br_relative        |
| 10 | MMX                  | 41 | Cl_relative        |
| 11 | SX6                  | 42 | F_relative         |
| 12 | SX                   | 43 | C                  |
| 13 | MMY6                 | 44 | H                  |
| 14 | MMY                  | 45 | O                  |
| 15 | SY6                  | 46 | S                  |
| 16 | SY                   | 47 | N                  |
| 17 | Volume_1             | 48 | Br                 |
| 18 | Volume_2             | 49 | Cl                 |
| 19 | MMX6_3D              | 50 | F                  |
| 20 | MMX_3D               | 51 | C_rel_2D           |
| 21 | SX6_3D               | 52 | allAtoms_rel_2D    |
| 22 | SX_3D                | 53 | C_rel_XY_3D        |
| 23 | MMY6_3D              | 54 | allAtoms_rel_XY_3D |
| 24 | MMY_3D               | 55 | C_rel_XZ_3D        |
| 25 | SY6_3D               | 56 | allAtoms_rel_XZ_3D |
| 26 | SY_3D                | 57 | C_rel_YZ_3D        |
| 27 | MMZ6_3D              | 58 | allAtoms_rel_YZ_3D |
| 28 | MMZ_3D               | 59 | Similarity         |
| 29 | SZ6_3D               | 60 | target             |
| 30 | SZ_3D                |    |                    |

### Features imported from the PubChem database.

1. **Molecular weight** [feature 1 in the list above] is calculated as the sum of the mass of each constituent atom multiplied by the number of atoms of that element in the molecular formula.
2. **The topological polar surface area** [feature 2] is an estimate of the polar surface area of a molecule, computed as the surface sum over polar atoms in the molecule<sup>11</sup>.
3. **XLogP3** [3] is a predicted octanol-water partition coefficient measuring the hydrophilicity or hydrophobicity of a molecule<sup>12</sup>.
4. **Heavy Atom Count** [4] is the number of heavy atoms (i.e., non-hydrogen atoms) in the given compound.
5. **Hydrogen Bond Donor Count** [5] in the compound
6. **Hydrogen Bond Acceptor Count** [6] in the compound.
7. **Rotatable Bond Count** [7] is defined as any single-order non-ring bond, where atoms on either side of the bond are in turn bound to nonterminal heavy (i.e., non-hydrogen) atoms. That is, where rotation around the bond axis changes the overall shape of the molecule and generates conformers.
8. **Covalently Bonded Unit Count** [8] is the number of groups of atoms connected by covalent bonds.
9. **The atomic coordinates**<sup>13</sup> provided by PubChem carry information about the two and three-dimensional presentation of the molecular structure of the substances and compounds. These coordinates were not used directly as attributes in the new data set but to calculate new features later.
10. **SMILES** Simplified Molecular-Input Line-Entry System<sup>14</sup> that a line notation describes the three-dimensional structure of Chemical formulations was used to calculate the attribute Similarity described below.



11. **Molecular formulas** contain information about the type of atoms and their number in molecules. These data were used to calculate the mass fraction and the relative fraction of atoms in the molecule for each compound under consideration.

#### Features derived by additional calculations.

13. **Difference between Min and Max of the atoms' coordinates** [features 9-10; 13-14; 19-20; 23-24; 27-28] of the compounds. Based on the PubChem database, in order to distinguish the isomers from each other, the minima of the 2D coordinates of the substances were subtracted from the maxima along the x and y axes. Initially, this was performed for all atoms, but given that carbon atoms create the "skeleton" of the organic compound, similar calculations were also done for carbon atoms only. Thus, four new features were added to the new data set. The same was done with the 3D coordinates of the compounds, but this time six new features were added as z-axis calculations were also considered.
14. **Skewness of the atom coordinate distribution** [features 11-12; 15-16; 21-22; 25-26; 29-30]. The next four features derived from 2D coordinates and six new features from 3D coordinates are related to the distribution of the atoms along the x, y and z axes. Following the logic of the min-max difference explained above, the values of skewness were calculated first for all atoms and then only for the carbon atoms.
15. **Two types of hypothetical volumes of the molecules** [features 17-18, 31-34]. The first type was calculated based on the 2D coordinates that carry information about the isomers. Since atoms, respectively molecules are not flat, the 2D data of the atomic coordinates of the substances were used to obtain a hypothetical 3D volume of the compounds. These computations were based on the previously obtained min-max values of the atoms' coordinates. The second variant of the imaginary volumes was calculated using the already computed skewness of the atoms' coordinates.
16. **The relative proportion of the atoms in the molecules of the considered compounds** [features 35-42], are features that carry information about the proportion of the number of a given type of atom to the total number of atoms in the molecules of the given compound. This added eight features where each one of them was named after the corresponding chemical element.
17. **The mass proportion of the atoms in the molecules of the considered compound** [features 43-50] was calculated as the proportion of the mass of all identical atoms in the molecule to the mass of all atoms in the molecule of the given compound. These calculations added eight features to the new data set.
18. **The size ratio of the molecules of a considered compound** [features 51-58] was calculated along the x, y and z axes, creating six new columns.
19. **SMILES similarity** [feature 59] was based on the comparison between SMILES of the compounds and Lysine. Lysine was chosen because the methylation has been performed in the Lysine residue. The "Similarity" feature was generated using the toolkit for cheminformatics RDKit's packages. For more information, see the code in GitHub, file "data\_sets\_generation\_with\_SMOTE.ipynb"; [In 87] "Adding similarity between the compounds based on their SMILES.

## Packages

- PyPI <https://pypi.org/>
- missingno <https://pypi.org/project/missingno/>
- Chemformula <https://pypi.org/project/chemformula/>
- Tables <https://pypi.org/project/tables/>
- Jupyter Notebook How to cite Jupyter notebook - Cite Bay
- NumPy - Citing NumPy
- Matplotlib <https://matplotlib.org/>
- Seaborn <https://seaborn.pydata.org/>
- pandas <https://pandas.pydata.org/>
- Rdkit. <https://www.rdkit.org> <https://doi.org/10.5281/zenodo.591637>
- imbalanced-learn <https://imbalanced-learn.org/stable/>
- Xgboost <https://xgboost.readthedocs.io/en/stable/>
